# Supplementary material for: The study of degradation mechanisms of glyco-engineered plant produced anti-rabies monoclonal antibodies E559 and 62-71-3
Source: PLoS One. 2018 Dec 20;13(12):e0209373. doi: 10.1371/journal.pone.0209373 (PMC6301680; doi:10.1371/journal.pone.0209373)
Supplement: S1 File — 62-71-3 peptide list, oxidation time points and total area. (CSV) [file pone.0209373.s007.csv]

Peptide Modified Sequence	Peptide Sequence	Peptide Peak Found Ratio	Peptide Retention Time	Protein Name	Replicate	Oxidation groups	Total Area MS1
SLTGHGVNW	SLTGHGVNW	1	9.72	62_71_3_HC	Cntrl_1	Cntl	39748048
SLTGHGVNW	SLTGHGVNW	1	9.49	62_71_3_HC	Cntrl_2	Cntl	34174264
SLTGHGVNW	SLTGHGVNW	1	10	62_71_3_HC	4hr_1	4hr	99092512
SLTGHGVNW	SLTGHGVNW	1	10.01	62_71_3_HC	4hr_2	4hr	94122272
SLTGHGVNW	SLTGHGVNW	1	10.03	62_71_3_HC	20hr_1	20hr	52017548
SLTGHGVNW	SLTGHGVNW	1	10.02	62_71_3_HC	20hr_2	20hr	50271092
SLTGHGVNW	SLTGHGVNW	1	10.1	62_71_3_HC	48hr_1	48hr	86401096
SLTGHGVNW	SLTGHGVNW	1	10.07	62_71_3_HC	48hr_2	48hr	82135128
SLTGHGVNW[+16]	SLTGHGVNW	1	9.72	62_71_3_HC	Cntrl_1	Cntl	229292
SLTGHGVNW[+16]	SLTGHGVNW	1	9.5	62_71_3_HC	Cntrl_2	Cntl	200582
SLTGHGVNW[+16]	SLTGHGVNW	1	9.48	62_71_3_HC	4hr_1	4hr	353156
SLTGHGVNW[+16]	SLTGHGVNW	1	9.25	62_71_3_HC	4hr_2	4hr	305053
SLTGHGVNW[+16]	SLTGHGVNW	1	9.49	62_71_3_HC	20hr_1	20hr	452933
SLTGHGVNW[+16]	SLTGHGVNW	1	9.53	62_71_3_HC	20hr_2	20hr	465258
SLTGHGVNW[+16]	SLTGHGVNW	1	9.56	62_71_3_HC	48hr_1	48hr	624094
SLTGHGVNW[+16]	SLTGHGVNW	1	9.52	62_71_3_HC	48hr_2	48hr	627128
VRQPPGKGLEW	VRQPPGKGLEW	1	10.27	62_71_3_HC	Cntrl_1	Cntl	248927
VRQPPGKGLEW	VRQPPGKGLEW	1	10.21	62_71_3_HC	Cntrl_2	Cntl	206789
VRQPPGKGLEW	VRQPPGKGLEW	1	10.72	62_71_3_HC	4hr_1	4hr	2573994
VRQPPGKGLEW	VRQPPGKGLEW	1	10.7	62_71_3_HC	4hr_2	4hr	2411317
VRQPPGKGLEW	VRQPPGKGLEW	1	10.63	62_71_3_HC	20hr_1	20hr	1250437
VRQPPGKGLEW	VRQPPGKGLEW	1	10.6	62_71_3_HC	20hr_2	20hr	1200599
VRQPPGKGLEW	VRQPPGKGLEW	1	10.8	62_71_3_HC	48hr_1	48hr	1003282
VRQPPGKGLEW	VRQPPGKGLEW	1	10.79	62_71_3_HC	48hr_2	48hr	1072243
VRQPPGKGLEW[+16]L	VRQPPGKGLEWL	1	10	62_71_3_HC	Cntrl_1	Cntl	33511
VRQPPGKGLEW[+16]L	VRQPPGKGLEWL	1	10.16	62_71_3_HC	Cntrl_2	Cntl	24053
VRQPPGKGLEW[+16]L	VRQPPGKGLEWL	1	10.97	62_71_3_HC	4hr_1	4hr	110277
VRQPPGKGLEW[+16]L	VRQPPGKGLEWL	1	10.93	62_71_3_HC	4hr_2	4hr	115985
VRQPPGKGLEW[+16]L	VRQPPGKGLEWL	1	10.9	62_71_3_HC	20hr_1	20hr	117060
VRQPPGKGLEW[+16]L	VRQPPGKGLEWL	1	10.92	62_71_3_HC	20hr_2	20hr	125022
VRQPPGKGLEW[+16]L	VRQPPGKGLEWL	1	11.11	62_71_3_HC	48hr_1	48hr	110099
VRQPPGKGLEW[+16]L	VRQPPGKGLEWL	1	11.11	62_71_3_HC	48hr_2	48hr	109775
LGIIWADGTTNY	LGIIWADGTTNY	1	12.09	62_71_3_HC	Cntrl_1	Cntl	301288
LGIIWADGTTNY	LGIIWADGTTNY	1	12.08	62_71_3_HC	Cntrl_2	Cntl	297148
LGIIWADGTTNY	LGIIWADGTTNY	1	12.15	62_71_3_HC	4hr_1	4hr	2960794
LGIIWADGTTNY	LGIIWADGTTNY	1	12.15	62_71_3_HC	4hr_2	4hr	2959068
LGIIWADGTTNY	LGIIWADGTTNY	1	12.16	62_71_3_HC	20hr_1	20hr	824026
LGIIWADGTTNY	LGIIWADGTTNY	1	12.16	62_71_3_HC	20hr_2	20hr	813447
LGIIWADGTTNY	LGIIWADGTTNY	1	12.2	62_71_3_HC	48hr_1	48hr	1011401
LGIIWADGTTNY	LGIIWADGTTNY	1	12.25	62_71_3_HC	48hr_2	48hr	1024168
LGIIWAD[+22]GTTNY	LGIIWADGTTNY	1	12.09	62_71_3_HC	Cntrl_1	Cntl	163458
LGIIWAD[+22]GTTNY	LGIIWADGTTNY	1	12.09	62_71_3_HC	Cntrl_2	Cntl	152098
LGIIWAD[+22]GTTNY	LGIIWADGTTNY	1	12.15	62_71_3_HC	4hr_1	4hr	1176745
LGIIWAD[+22]GTTNY	LGIIWADGTTNY	1	12.15	62_71_3_HC	4hr_2	4hr	1056495
LGIIWAD[+22]GTTNY	LGIIWADGTTNY	1	12.17	62_71_3_HC	20hr_1	20hr	397139
LGIIWAD[+22]GTTNY	LGIIWADGTTNY	1	12.16	62_71_3_HC	20hr_2	20hr	376359
LGIIWAD[+22]GTTNY	LGIIWADGTTNY	1	12.24	62_71_3_HC	48hr_1	48hr	396585
LGIIWAD[+22]GTTNY	LGIIWADGTTNY	1	12.24	62_71_3_HC	48hr_2	48hr	408903
LGIIW[+16]AD[+22]GTTNY	LGIIWADGTTNY	1	12.09	62_71_3_HC	Cntrl_1	Cntl	22536
LGIIW[+16]AD[+22]GTTNY	LGIIWADGTTNY	1	12.08	62_71_3_HC	Cntrl_2	Cntl	23335
LGIIW[+16]AD[+22]GTTNY	LGIIWADGTTNY	1	12.16	62_71_3_HC	4hr_1	4hr	161359
LGIIW[+16]AD[+22]GTTNY	LGIIWADGTTNY	1	12.15	62_71_3_HC	4hr_2	4hr	165360
LGIIW[+16]AD[+22]GTTNY	LGIIWADGTTNY	1	12.16	62_71_3_HC	20hr_1	20hr	52958
LGIIW[+16]AD[+22]GTTNY	LGIIWADGTTNY	1	12.16	62_71_3_HC	20hr_2	20hr	58041
LGIIW[+16]AD[+22]GTTNY	LGIIWADGTTNY	1	12.24	62_71_3_HC	48hr_1	48hr	52425
LGIIW[+16]AD[+22]GTTNY	LGIIWADGTTNY	1	12.25	62_71_3_HC	48hr_2	48hr	53247
LKMNSLQTDDTASY	LKMNSLQTDDTASY	1	9.18	62_71_3_HC	Cntrl_1	Cntl	9011748
LKMNSLQTDDTASY	LKMNSLQTDDTASY	1	9.04	62_71_3_HC	Cntrl_2	Cntl	8210121
LKMNSLQTDDTASY	LKMNSLQTDDTASY	1	9.61	62_71_3_HC	4hr_1	4hr	4899702
LKMNSLQTDDTASY	LKMNSLQTDDTASY	1	9.62	62_71_3_HC	4hr_2	4hr	4728367
LKMNSLQTDDTASY	LKMNSLQTDDTASY	1	9.64	62_71_3_HC	20hr_1	20hr	675140
LKMNSLQTDDTASY	LKMNSLQTDDTASY	1	9.63	62_71_3_HC	20hr_2	20hr	661301
LKMNSLQTDDTASY	LKMNSLQTDDTASY	1	9.67	62_71_3_HC	48hr_1	48hr	902535
LKMNSLQTDDTASY	LKMNSLQTDDTASY	1	9.66	62_71_3_HC	48hr_2	48hr	896107
LKM[+16]NSLQTDDTASY	LKMNSLQTDDTASY	1	9.22	62_71_3_HC	Cntrl_1	Cntl	85945
LKM[+16]NSLQTDDTASY	LKMNSLQTDDTASY	1	9.04	62_71_3_HC	Cntrl_2	Cntl	77384
LKM[+16]NSLQTDDTASY	LKMNSLQTDDTASY	1	8.49	62_71_3_HC	4hr_1	4hr	8309820
LKM[+16]NSLQTDDTASY	LKMNSLQTDDTASY	1	8.44	62_71_3_HC	4hr_2	4hr	8219496
LKM[+16]NSLQTDDTASY	LKMNSLQTDDTASY	1	8.99	62_71_3_HC	20hr_1	20hr	4089735
LKM[+16]NSLQTDDTASY	LKMNSLQTDDTASY	1	8.99	62_71_3_HC	20hr_2	20hr	3751786
LKM[+16]NSLQTDDTASY	LKMNSLQTDDTASY	1	9.02	62_71_3_HC	48hr_1	48hr	3867376
LKM[+16]NSLQTDDTASY	LKMNSLQTDDTASY	1	9.02	62_71_3_HC	48hr_2	48hr	3787149
KMNSLQTDDTASY	KMNSLQTDDTASY	1	8.38	62_71_3_HC	Cntrl_1	Cntl	2447353
KMNSLQTDDTASY	KMNSLQTDDTASY	1	8.21	62_71_3_HC	Cntrl_2	Cntl	1927489
KMNSLQTDDTASY	KMNSLQTDDTASY	1	8.63	62_71_3_HC	4hr_1	4hr	1109690
KMNSLQTDDTASY	KMNSLQTDDTASY	1	8.61	62_71_3_HC	4hr_2	4hr	1051961
KMNSLQTDDTASY	KMNSLQTDDTASY	1	9.13	62_71_3_HC	20hr_1	20hr	155253
KMNSLQTDDTASY	KMNSLQTDDTASY	1	9.12	62_71_3_HC	20hr_2	20hr	134526
KMNSLQTDDTASY	KMNSLQTDDTASY	1	9.11	62_71_3_HC	48hr_1	48hr	211517
KMNSLQTDDTASY	KMNSLQTDDTASY	1	9.12	62_71_3_HC	48hr_2	48hr	205125
KM[+16]NSLQTDDTASY	KMNSLQTDDTASY	1	6.55	62_71_3_HC	Cntrl_1	Cntl	2956
KM[+16]NSLQTDDTASY	KMNSLQTDDTASY	1	6.54	62_71_3_HC	Cntrl_2	Cntl	3437
KM[+16]NSLQTDDTASY	KMNSLQTDDTASY	1	6.51	62_71_3_HC	4hr_1	4hr	331914
KM[+16]NSLQTDDTASY	KMNSLQTDDTASY	1	6.49	62_71_3_HC	4hr_2	4hr	351426
KM[+16]NSLQTDDTASY	KMNSLQTDDTASY	1	6.51	62_71_3_HC	20hr_1	20hr	28018
KM[+16]NSLQTDDTASY	KMNSLQTDDTASY	1	6.49	62_71_3_HC	20hr_2	20hr	30686
KM[+16]NSLQTDDTASY	KMNSLQTDDTASY	1	6.54	62_71_3_HC	48hr_1	48hr	27267
KM[+16]NSLQTDDTASY	KMNSLQTDDTASY	1	6.53	62_71_3_HC	48hr_2	48hr	27213
TVLHQDWLNGKEY	TVLHQDWLNGKEY	1	10.49	62_71_3_HC	Cntrl_1	Cntl	12524075
TVLHQDWLNGKEY	TVLHQDWLNGKEY	1	10.48	62_71_3_HC	Cntrl_2	Cntl	12033656
TVLHQDWLNGKEY	TVLHQDWLNGKEY	1	10.88	62_71_3_HC	4hr_1	4hr	25774572
TVLHQDWLNGKEY	TVLHQDWLNGKEY	1	10.88	62_71_3_HC	4hr_2	4hr	24864384
TVLHQDWLNGKEY	TVLHQDWLNGKEY	1	10.77	62_71_3_HC	20hr_1	20hr	7684735
TVLHQDWLNGKEY	TVLHQDWLNGKEY	1	10.78	62_71_3_HC	20hr_2	20hr	7212316
TVLHQDWLNGKEY	TVLHQDWLNGKEY	1	10.93	62_71_3_HC	48hr_1	48hr	12773602
TVLHQDWLNGKEY	TVLHQDWLNGKEY	1	10.93	62_71_3_HC	48hr_2	48hr	12434144
TVLHQDW[+16]LNGKEY	TVLHQDWLNGKEY	1	10.5	62_71_3_HC	Cntrl_1	Cntl	294464
TVLHQDW[+16]LNGKEY	TVLHQDWLNGKEY	1	10.44	62_71_3_HC	Cntrl_2	Cntl	304830
TVLHQDW[+16]LNGKEY	TVLHQDWLNGKEY	1	10.49	62_71_3_HC	4hr_1	4hr	374497
TVLHQDW[+16]LNGKEY	TVLHQDWLNGKEY	1	10.48	62_71_3_HC	4hr_2	4hr	276677
TVLHQDW[+16]LNGKEY	TVLHQDWLNGKEY	1	10.46	62_71_3_HC	20hr_1	20hr	147813
TVLHQDW[+16]LNGKEY	TVLHQDWLNGKEY	1	10.43	62_71_3_HC	20hr_2	20hr	213465
TVLHQDW[+16]LNGKEY	TVLHQDWLNGKEY	1	10.58	62_71_3_HC	48hr_1	48hr	202571
TVLHQDW[+16]LNGKEY	TVLHQDWLNGKEY	1	10.52	62_71_3_HC	48hr_2	48hr	234383
SC[+57]SVMHEALHNHY	SCSVMHEALHNHY	1	10.16	62_71_3_HC	Cntrl_1	Cntl	12842850
SC[+57]SVMHEALHNHY	SCSVMHEALHNHY	1	10.08	62_71_3_HC	Cntrl_2	Cntl	10928768
SC[+57]SVMHEALHNHY	SCSVMHEALHNHY	1	10.64	62_71_3_HC	4hr_1	4hr	11674
SC[+57]SVMHEALHNHY	SCSVMHEALHNHY	1	10.69	62_71_3_HC	4hr_2	4hr	8580
SC[+57]SVMHEALHNHY	SCSVMHEALHNHY	1	10.49	62_71_3_HC	20hr_1	20hr	13464
SC[+57]SVMHEALHNHY	SCSVMHEALHNHY	1	10.4	62_71_3_HC	20hr_2	20hr	9598
SC[+57]SVMHEALHNHY	SCSVMHEALHNHY	1	10.61	62_71_3_HC	48hr_1	48hr	72801
SC[+57]SVMHEALHNHY	SCSVMHEALHNHY	1	10.66	62_71_3_HC	48hr_2	48hr	68143
SC[+57]SVM[+16]HEALHNHY	SCSVMHEALHNHY	1	5.44	62_71_3_HC	Cntrl_1	Cntl	230058
SC[+57]SVM[+16]HEALHNHY	SCSVMHEALHNHY	1	5.4	62_71_3_HC	Cntrl_2	Cntl	244969
SC[+57]SVM[+16]HEALHNHY	SCSVMHEALHNHY	1	5.44	62_71_3_HC	4hr_1	4hr	3233
SC[+57]SVM[+16]HEALHNHY	SCSVMHEALHNHY	1	5.4	62_71_3_HC	4hr_2	4hr	3508
SC[+57]SVM[+16]HEALHNHY	SCSVMHEALHNHY	1	5.4	62_71_3_HC	20hr_1	20hr	1216
SC[+57]SVM[+16]HEALHNHY	SCSVMHEALHNHY	1	5.4	62_71_3_HC	20hr_2	20hr	1584
SC[+57]SVM[+16]HEALHNHY	SCSVMHEALHNHY	1	5.47	62_71_3_HC	48hr_1	48hr	2512
SC[+57]SVM[+16]HEALHNHY	SCSVMHEALHNHY	1	5.44	62_71_3_HC	48hr_2	48hr	2393
AAGTTCVTTGW	AAGTTCVTTGW	#N/A	#N/A	Library Peptides			#N/A
AAHCGVTTSDVVVAGEF	AAHCGVTTSDVVVAGEF	#N/A	#N/A	Library Peptides			#N/A
AAHCGVTTSDVVVAGEFDQGSSSEKIQKL	AAHCGVTTSDVVVAGEFDQGSSSEKIQKL	#N/A	#N/A	Library Peptides			#N/A
ACEVTHQGL	ACEVTHQGL	#N/A	#N/A	Library Peptides			#N/A
AC[+57]EVTHQGL	ACEVTHQGL	#N/A	#N/A	Library Peptides			#N/A
ACEVTHQGLS	ACEVTHQGLS	#N/A	#N/A	Library Peptides			#N/A
AC[+57]EVTHQGLS	ACEVTHQGLS	#N/A	#N/A	Library Peptides			#N/A
ACEVTHQGLSSPVTK	ACEVTHQGLSSPVTK	#N/A	#N/A	Library Peptides			#N/A
AC[+57]EVTHQGLSSPVTK	ACEVTHQGLSSPVTK	#N/A	#N/A	Library Peptides			#N/A
AC[+57]EVTHQGLSSPVTKSF	ACEVTHQGLSSPVTKSF	#N/A	#N/A	Library Peptides			#N/A
AC[+57]EVTHQGLSSPVTKSF	ACEVTHQGLSSPVTKSF	#N/A	#N/A	Library Peptides			#N/A
ACEVTHQGLSSPVTKSF	ACEVTHQGLSSPVTKSF	#N/A	#N/A	Library Peptides			#N/A
AC[+57]EVTHQGLSSPVTKSF[+22]	ACEVTHQGLSSPVTKSF	#N/A	#N/A	Library Peptides			#N/A
AC[+57]EVTHQGLSSPVTKSFNRGEC[+57]	ACEVTHQGLSSPVTKSFNRGEC	#N/A	#N/A	Library Peptides			#N/A
AKGQPREPQVY	AKGQPREPQVY	#N/A	#N/A	Library Peptides			#N/A
ALHNHY	ALHNHY	#N/A	#N/A	Library Peptides			#N/A
ALVNWVQQTL	ALVNWVQQTL	#N/A	#N/A	Library Peptides			#N/A
ANTPDRL	ANTPDRL	#N/A	#N/A	Library Peptides			#N/A
ANTPDRLQQASLPL	ANTPDRLQQASLPL	#N/A	#N/A	Library Peptides			#N/A
CAREGDISGY	CAREGDISGY	#N/A	#N/A	Library Peptides			#N/A
CGVPAIQPVLSGL	CGVPAIQPVLSGL	#N/A	#N/A	Library Peptides			#N/A
C[+57]GVPAIQPVLSGL	CGVPAIQPVLSGL	#N/A	#N/A	Library Peptides			#N/A
C[+57]LVKDYFPEPVTVSW	CLVKDYFPEPVTVSW	#N/A	#N/A	Library Peptides			#N/A
C[+57]LVKGFYPSDIAVEW	CLVKGFYPSDIAVEW	#N/A	#N/A	Library Peptides			#N/A
C[+57]LVKGFYPSD[+22]IAVEW	CLVKGFYPSDIAVEW	#N/A	#N/A	Library Peptides			#N/A
C[+57]LVKGFYPSD[+22]IAVEW	CLVKGFYPSDIAVEW	#N/A	#N/A	Library Peptides			#N/A
C[+57]LVKGFYPSDIAVEWESNGQPENNY	CLVKGFYPSDIAVEWESNGQPENNY	#N/A	#N/A	Library Peptides			#N/A
C[+57]LVKGFYPSDIAVEWESNGQPE[+22]NNY	CLVKGFYPSDIAVEWESNGQPENNY	#N/A	#N/A	Library Peptides			#N/A
CQQGNTLPPTFGGGTKL	CQQGNTLPPTFGGGTKL	#N/A	#N/A	Library Peptides			#N/A
C[+57]RPSQDINNY	CRPSQDINNY	#N/A	#N/A	Library Peptides			#N/A
C[+57]RPSQDINNYLSW	CRPSQDINNYLSW	#N/A	#N/A	Library Peptides			#N/A
C[+57]RPSQDINNYLSWY	CRPSQDINNYLSWY	#N/A	#N/A	Library Peptides			#N/A
C[+57]SVMHEALHNHY	CSVMHEALHNHY	#N/A	#N/A	Library Peptides			#N/A
DIELTQSPSSL	DIELTQSPSSL	#N/A	#N/A	Library Peptides			#N/A
DIELTQSPSSLSASLGERVSL	DIELTQSPSSLSASLGERVSL	#N/A	#N/A	Library Peptides			#N/A
DIELTQSPSSLSASLGERVSL	DIELTQSPSSLSASLGERVSL	#N/A	#N/A	Library Peptides			#N/A
DQGSSSEK	DQGSSSEK	#N/A	#N/A	Library Peptides			#N/A
DQGSSSEKIQ	DQGSSSEKIQ	#N/A	#N/A	Library Peptides			#N/A
DQGSSSEKIQKL	DQGSSSEKIQKL	#N/A	#N/A	Library Peptides			#N/A
DQGSSSEKIQKL	DQGSSSEKIQKL	#N/A	#N/A	Library Peptides			#N/A
DVQMTQ	DVQMTQ	#N/A	#N/A	Library Peptides			#N/A
DVQMTQTT	DVQMTQTT	#N/A	#N/A	Library Peptides			#N/A
DVQMTQTTS	DVQMTQTTS	#N/A	#N/A	Library Peptides			#N/A
DVQM[+16]TQTTS	DVQMTQTTS	#N/A	#N/A	Library Peptides			#N/A
D[+16]VQMTQTTSSL	DVQMTQTTSSL	#N/A	#N/A	Library Peptides			#N/A
D[+16]VQMTQTTSSLS	DVQMTQTTSSLS	#N/A	#N/A	Library Peptides			#N/A
DVQM[+16]TQTTSSLS	DVQMTQTTSSLS	#N/A	#N/A	Library Peptides			#N/A
D[+16]VQMTQTTSSLSA	DVQMTQTTSSLSA	#N/A	#N/A	Library Peptides			#N/A
DVQM[+16]TQTTSSLSA	DVQMTQTTSSLSA	#N/A	#N/A	Library Peptides			#N/A
DVQMTQTTSSLSASLGDRVTI	DVQMTQTTSSLSASLGDRVTI	#N/A	#N/A	Library Peptides			#N/A
DVQMTQTTSSLSASLGDRVTI	DVQMTQTTSSLSASLGDRVTI	#N/A	#N/A	Library Peptides			#N/A
DVQM[+16]TQTTSSLSASLGDRVTI	DVQMTQTTSSLSASLGDRVTI	#N/A	#N/A	Library Peptides			#N/A
DVQM[+16]TQTTSSLSASLGDRVTI	DVQMTQTTSSLSASLGDRVTI	#N/A	#N/A	Library Peptides			#N/A
D[+22]VQM[+16]TQTTSSLSASLGDRVTI	DVQMTQTTSSLSASLGDRVTI	#N/A	#N/A	Library Peptides			#N/A
DVQMTQTTSSLSASLGDRVTIT	DVQMTQTTSSLSASLGDRVTIT	#N/A	#N/A	Library Peptides			#N/A
EALHNHY	EALHNHY	#N/A	#N/A	Library Peptides			#N/A
EIKRTVAAPSVF	EIKRTVAAPSVF	#N/A	#N/A	Library Peptides			#N/A
ESNGQPENNY	ESNGQPENNY	#N/A	#N/A	Library Peptides			#N/A
ESNGQPE[+22]NNY	ESNGQPENNY	#N/A	#N/A	Library Peptides			#N/A
ESNGQPENNYKTTPPVLDSD[+22]GSFF	ESNGQPENNYKTTPPVLDSDGSFF	#N/A	#N/A	Library Peptides			#N/A
FCQQGNTLPPTFGGGTKL	FCQQGNTLPPTFGGGTKL	#N/A	#N/A	Library Peptides			#N/A
FCQQGNTLPPTFGGGTKL	FCQQGNTLPPTFGGGTKL	#N/A	#N/A	Library Peptides			#N/A
FTQDWVSLPGVLPVASGGIHVW	FTQDWVSLPGVLPVASGGIHVW	#N/A	#N/A	Library Peptides			#N/A
GCLVKDYFPEPVTVSW	GCLVKDYFPEPVTVSW	#N/A	#N/A	Library Peptides			#N/A
GC[+57]LVKDYFPE[+22]P[+16]VTVSW	GCLVKDYFPEPVTVSW	#N/A	#N/A	Library Peptides			#N/A
GGGTLGHPW	GGGTLGHPW	#N/A	#N/A	Library Peptides			#N/A
GLSSPVTKSF	GLSSPVTKSF	#N/A	#N/A	Library Peptides			#N/A
GNAPGAVANRVAL	GNAPGAVANRVAL	#N/A	#N/A	Library Peptides			#N/A
GQPREPQVY	GQPREPQVY	#N/A	#N/A	Library Peptides			#N/A
GSSTCSTSTPGVY	GSSTCSTSTPGVY	#N/A	#N/A	Library Peptides			#N/A
GSSTC[+57]STSTPGVY	GSSTCSTSTPGVY	#N/A	#N/A	Library Peptides			#N/A
GTKIKDAM	GTKIKDAM	#N/A	#N/A	Library Peptides			#N/A
GTKIKDAMI	GTKIKDAMI	#N/A	#N/A	Library Peptides			#N/A
GVPAIQPVLSGL	GVPAIQPVLSGL	#N/A	#N/A	Library Peptides			#N/A
HFCGGSLINENW	HFCGGSLINENW	#N/A	#N/A	Library Peptides			#N/A
HMPALTEIFGDDSVL	HMPALTEIFGDDSVL	#N/A	#N/A	Library Peptides			#N/A
HMPALTEIFGDDSVLQF	HMPALTEIFGDDSVLQF	#N/A	#N/A	Library Peptides			#N/A
HTC[+57]PPC[+57]PAPELLGGPSVF	HTCPPCPAPELLGGPSVF	#N/A	#N/A	Library Peptides			#N/A
ICNVNHKPSNT	ICNVNHKPSNT	#N/A	#N/A	Library Peptides			#N/A
ICNVNHKPSNT	ICNVNHKPSNT	#N/A	#N/A	Library Peptides			#N/A
IC[+57]NVNHKPSNT	ICNVNHKPSNT	#N/A	#N/A	Library Peptides			#N/A
IGQIHPNSDY	IGQIHPNSDY	#N/A	#N/A	Library Peptides			#N/A
IGQIHPNSDYTNY	IGQIHPNSDYTNY	#N/A	#N/A	Library Peptides			#N/A
IQPVLSGL	IQPVLSGL	#N/A	#N/A	Library Peptides			#N/A
ISKAKGQPREPQVY	ISKAKGQPREPQVY	#N/A	#N/A	Library Peptides			#N/A
ISKDNSKSQVF	ISKDNSKSQVF	#N/A	#N/A	Library Peptides			#N/A
ISRTPEVT	ISRTPEVT	#N/A	#N/A	Library Peptides			#N/A
ISRTPEVTCVVVDVSHEDPEVKF	ISRTPEVTCVVVDVSHEDPEVKF	#N/A	#N/A	Library Peptides			#N/A
ISRTPEVTC[+57]VVVDVSHEDPEVKF	ISRTPEVTCVVVDVSHEDPEVKF	#N/A	#N/A	Library Peptides			#N/A
ISRTPEVTC[+57]VVVDVSHEDPEVKFNWY	ISRTPEVTCVVVDVSHEDPEVKFNWY	#N/A	#N/A	Library Peptides			#N/A
ISSSTI	ISSSTI	#N/A	#N/A	Library Peptides			#N/A
IVNGEEAVPGSWPW	IVNGEEAVPGSWPW	#N/A	#N/A	Library Peptides			#N/A
IVNGEE[+22]AVPGSWPW	IVNGEEAVPGSWPW	#N/A	#N/A	Library Peptides			#N/A
IVNGE[+22]EAVPGSWPW[+22]	IVNGEEAVPGSWPW	#N/A	#N/A	Library Peptides			#N/A
IVNGEEAVPGSWPWQVSL[+22]	IVNGEEAVPGSWPWQVSL	#N/A	#N/A	Library Peptides			#N/A
IVNGEEAVPGSWPWQVSLQDKTGF	IVNGEEAVPGSWPWQVSLQDKTGF	#N/A	#N/A	Library Peptides			#N/A
IVNGEEAVPGSWPWQVSLQDKTGF	IVNGEEAVPGSWPWQVSLQDKTGF	#N/A	#N/A	Library Peptides			#N/A
IVNGE[+22]EAVPGSWPWQVSLQDKTGF	IVNGEEAVPGSWPWQVSLQDKTGF	#N/A	#N/A	Library Peptides			#N/A
IVNGEE[+22]AVPGSWPWQVSLQDKTGF	IVNGEEAVPGSWPWQVSLQDKTGF	#N/A	#N/A	Library Peptides			#N/A
KAKGQPREPQVY	KAKGQPREPQVY	#N/A	#N/A	Library Peptides			#N/A
KC[+57]KVSN	KCKVSN	#N/A	#N/A	Library Peptides			#N/A
KESGPGLLAPSQSLSITCTVSGF	KESGPGLLAPSQSLSITCTVSGF	#N/A	#N/A	Library Peptides			#N/A
KGQPREPQVY	KGQPREPQVY	#N/A	#N/A	Library Peptides			#N/A
KLATPAQF	KLATPAQF	#N/A	#N/A	Library Peptides			#N/A
KLSTAASF	KLSTAASF	#N/A	#N/A	Library Peptides			#N/A
KMN[+16]SLQTDDTASY	KMNSLQTDDTASY	#N/A	#N/A	Library Peptides			#N/A
KVDNALQSGNSQESVTEQDSKDST	KVDNALQSGNSQESVTEQDSKDST	#N/A	#N/A	Library Peptides			#N/A
KVDNALQSGNSQESVTEQDSKD[+16]STYSLSSTL	KVDNALQSGNSQESVTEQDSKDSTYSLSSTL	#N/A	#N/A	Library Peptides			#N/A
KVDNALQSGNSQESVTEQDSKDSTY[+16]SLSSTL	KVDNALQSGNSQESVTEQDSKDSTYSLSSTL	#N/A	#N/A	Library Peptides			#N/A
KVDNALQSGNSQESVTEQD[+22]SKDSTY[+16]SLSSTL	KVDNALQSGNSQESVTEQDSKDSTYSLSSTL	#N/A	#N/A	Library Peptides			#N/A
LFP[+16]PKPKDTL	LFPPKPKDTL	#N/A	#N/A	Library Peptides			#N/A
LFPPKPKDTLM	LFPPKPKDTLM	#N/A	#N/A	Library Peptides			#N/A
LFPPKPKDTLM[+16]	LFPPKPKDTLM	#N/A	#N/A	Library Peptides			#N/A
LGIIWADGTTN	LGIIWADGTTN	#N/A	#N/A	Library Peptides			#N/A
LKESGPGLLAPSQSL	LKESGPGLLAPSQSL	#N/A	#N/A	Library Peptides			#N/A
LKMN[+16]SL	LKMNSL	#N/A	#N/A	Library Peptides			#N/A
LKMN[+16]SLQTDDTASY	LKMNSLQTDDTASY	#N/A	#N/A	Library Peptides			#N/A
LLGGPSVF	LLGGPSVF	#N/A	#N/A	Library Peptides			#N/A
LSISKDNSKSQVF	LSISKDNSKSQVF	#N/A	#N/A	Library Peptides			#N/A
LSKADYEKHKVY	LSKADYEKHKVY	#N/A	#N/A	Library Peptides			#N/A
MISRTPEVT	MISRTPEVT	#N/A	#N/A	Library Peptides			#N/A
M[+16]ISRTPEVT	MISRTPEVT	#N/A	#N/A	Library Peptides			#N/A
MISRTPEVTCVVVDVSHEDPEVKF	MISRTPEVTCVVVDVSHEDPEVKF	#N/A	#N/A	Library Peptides			#N/A
NAKTKPREEQY	NAKTKPREEQY	#N/A	#N/A	Library Peptides			#N/A
NAKTKPREEQYNSTY	NAKTKPREEQYNSTY	#N/A	#N/A	Library Peptides			#N/A
NAKTKPREEQYNSTY	NAKTKPREEQYNSTY	#N/A	#N/A	Library Peptides			#N/A
NANTPDRL	NANTPDRL	#N/A	#N/A	Library Peptides			#N/A
NANTPDRLQQASLPL	NANTPDRLQQASLPL	#N/A	#N/A	Library Peptides			#N/A
NSGALTSGVH	NSGALTSGVH	#N/A	#N/A	Library Peptides			#N/A
NSGALTSGVHT	NSGALTSGVHT	#N/A	#N/A	Library Peptides			#N/A
NSGALTSGVHTF	NSGALTSGVHTF	#N/A	#N/A	Library Peptides			#N/A
NSLQTDDTASY	NSLQTDDTASY	#N/A	#N/A	Library Peptides			#N/A
NSLQTD[+22]DTASY	NSLQTDDTASY	#N/A	#N/A	Library Peptides			#N/A
NSLQTDD[+22]TASY	NSLQTDDTASY	#N/A	#N/A	Library Peptides			#N/A
NSLQTD[+22]DTASYY	NSLQTDDTASYY	#N/A	#N/A	Library Peptides			#N/A
NSLQTDD[+22]TASYY	NSLQTDDTASYY	#N/A	#N/A	Library Peptides			#N/A
NSLTINNDITLL	NSLTINNDITLL	#N/A	#N/A	Library Peptides			#N/A
NSLTINND[+22]ITLL	NSLTINNDITLL	#N/A	#N/A	Library Peptides			#N/A
NSLTINNDITLLKL	NSLTINNDITLLKL	#N/A	#N/A	Library Peptides			#N/A
NWYVDGVEVH	NWYVDGVEVH	#N/A	#N/A	Library Peptides			#N/A
NW[+16]YVDGVEVH	NWYVDGVEVH	#N/A	#N/A	Library Peptides			#N/A
NWY[+16]VDGVEVH	NWYVDGVEVH	#N/A	#N/A	Library Peptides			#N/A
NWYVD[+22]GVEVH	NWYVDGVEVH	#N/A	#N/A	Library Peptides			#N/A
NWYVDGVE[+22]VH	NWYVDGVEVH	#N/A	#N/A	Library Peptides			#N/A
NWYVDGVEVHN	NWYVDGVEVHN	#N/A	#N/A	Library Peptides			#N/A
NWYVDGVEVHNAK	NWYVDGVEVHNAK	#N/A	#N/A	Library Peptides			#N/A
PLAPSSKSTSGGTAAL	PLAPSSKSTSGGTAAL	#N/A	#N/A	Library Peptides			#N/A
PPKPKDTL	PPKPKDTL	#N/A	#N/A	Library Peptides			#N/A
QGLSSPVTKSF	QGLSSPVTKSF	#N/A	#N/A	Library Peptides			#N/A
QKPDGTVKLL	QKPDGTVKLL	#N/A	#N/A	Library Peptides			#N/A
QKPDGTVKLL	QKPDGTVKLL	#N/A	#N/A	Library Peptides			#N/A
QQASLPL	QQASLPL	#N/A	#N/A	Library Peptides			#N/A
QQGNVFSCSVMHEALHNHY	QQGNVFSCSVMHEALHNHY	#N/A	#N/A	Library Peptides			#N/A
QVSLQDKTGF	QVSLQDKTGF	#N/A	#N/A	Library Peptides			#N/A
QVSLQDKTGF	QVSLQDKTGF	#N/A	#N/A	Library Peptides			#N/A
QVSLQD[+22]KTGF	QVSLQDKTGF	#N/A	#N/A	Library Peptides			#N/A
RFSGSGSGTDY	RFSGSGSGTDY	#N/A	#N/A	Library Peptides			#N/A
RPSQDINNY	RPSQDINNY	#N/A	#N/A	Library Peptides			#N/A
RPSQDINNYLSW	RPSQDINNYLSW	#N/A	#N/A	Library Peptides			#N/A
RTVAAPSVF	RTVAAPSVF	#N/A	#N/A	Library Peptides			#N/A
SASLGDRVTI	SASLGDRVTI	#N/A	#N/A	Library Peptides			#N/A
SASLGDRVTIT	SASLGDRVTIT	#N/A	#N/A	Library Peptides			#N/A
SASLGDRVTITCRPSQDINNY	SASLGDRVTITCRPSQDINNY	#N/A	#N/A	Library Peptides			#N/A
SC[+57]DKTHTCPPC[+57]PAPELLGGPSVF	SCDKTHTCPPCPAPELLGGPSVF	#N/A	#N/A	Library Peptides			#N/A
SC[+57]DKTHTC[+57]PPC[+57]PAPELLGGPSVF	SCDKTHTCPPCPAPELLGGPSVF	#N/A	#N/A	Library Peptides			#N/A
SC[+57]KASGY	SCKASGY	#N/A	#N/A	Library Peptides			#N/A
SCSVMHEAL	SCSVMHEAL	#N/A	#N/A	Library Peptides			#N/A
SC[+57]SVMHEALH	SCSVMHEALH	#N/A	#N/A	Library Peptides			#N/A
SCSVMHEALHNHY	SCSVMHEALHNHY	#N/A	#N/A	Library Peptides			#N/A
SDVVVAGEFDQGSSSEKIQKL	SDVVVAGEFDQGSSSEKIQKL	#N/A	#N/A	Library Peptides			#N/A
SFNRGEC	SFNRGEC	#N/A	#N/A	Library Peptides			#N/A
SFNRGEC[+57]	SFNRGEC	#N/A	#N/A	Library Peptides			#N/A
SGALTSGVHTFPAVL	SGALTSGVHTFPAVL	#N/A	#N/A	Library Peptides			#N/A
SGALTSGVHTFPAVLQSSGLY	SGALTSGVHTFPAVLQSSGLY	#N/A	#N/A	Library Peptides			#N/A
SGNSQESVTEQDSKDSTY	SGNSQESVTEQDSKDSTY	#N/A	#N/A	Library Peptides			#N/A
SGSGSGTDYSLT	SGSGSGTDYSLT	#N/A	#N/A	Library Peptides			#N/A
SGSRSGSDY	SGSRSGSDY	#N/A	#N/A	Library Peptides			#N/A
SGVHTFPAVL	SGVHTFPAVL	#N/A	#N/A	Library Peptides			#N/A
SGVHTFPAVLQSSGLY	SGVHTFPAVLQSSGLY	#N/A	#N/A	Library Peptides			#N/A
SGVPSRF	SGVPSRF	#N/A	#N/A	Library Peptides			#N/A
SGVPSRFSGSGSGTDY	SGVPSRFSGSGSGTDY	#N/A	#N/A	Library Peptides			#N/A
SISKDNSKSQ	SISKDNSKSQ	#N/A	#N/A	Library Peptides			#N/A
SISKDNSKSQ	SISKDNSKSQ	#N/A	#N/A	Library Peptides			#N/A
SITCTVSGF	SITCTVSGF	#N/A	#N/A	Library Peptides			#N/A
SKADYEKH	SKADYEKH	#N/A	#N/A	Library Peptides			#N/A
SKDNSKSQVF	SKDNSKSQVF	#N/A	#N/A	Library Peptides			#N/A
SKSTSGGTAAL	SKSTSGGTAAL	#N/A	#N/A	Library Peptides			#N/A
SLDSGVPKRF	SLDSGVPKRF	#N/A	#N/A	Library Peptides			#N/A
SLDSGVPKRF	SLDSGVPKRF	#N/A	#N/A	Library Peptides			#N/A
SLQTDDTASY	SLQTDDTASY	#N/A	#N/A	Library Peptides			#N/A
SLQTDD[+22]TASY	SLQTDDTASY	#N/A	#N/A	Library Peptides			#N/A
SLQTDDTASYY	SLQTDDTASYY	#N/A	#N/A	Library Peptides			#N/A
SLQTDD[+22]TASYY	SLQTDDTASYY	#N/A	#N/A	Library Peptides			#N/A
SLSSVVTVP[+16]SSSL	SLSSVVTVPSSSL	#N/A	#N/A	Library Peptides			#N/A
SLSSVVTVPSSSLGTQ	SLSSVVTVPSSSLGTQ	#N/A	#N/A	Library Peptides			#N/A
SLSSVVTVPSSSLGTQ[+22]	SLSSVVTVPSSSLGTQ	#N/A	#N/A	Library Peptides			#N/A
SLSSVVTVP[+16]SSSLGTQTY[+22]	SLSSVVTVPSSSLGTQTY	#N/A	#N/A	Library Peptides			#N/A
SLTGHGVN	SLTGHGVN	#N/A	#N/A	Library Peptides			#N/A
SLTGHGVNWVRQPPG	SLTGHGVNWVRQPPG	#N/A	#N/A	Library Peptides			#N/A
SLTINND[+22]ITLL	SLTINNDITLL	#N/A	#N/A	Library Peptides			#N/A
SQESVTEQDSKDSTY	SQESVTEQDSKDSTY	#N/A	#N/A	Library Peptides			#N/A
SRIVNGEEAVPGSWPW	SRIVNGEEAVPGSWPW	#N/A	#N/A	Library Peptides			#N/A
SRIVNGEEAVPGSWPW[+22]	SRIVNGEEAVPGSWPW	#N/A	#N/A	Library Peptides			#N/A
SSLSASLGERVSL	SSLSASLGERVSL	#N/A	#N/A	Library Peptides			#N/A
SSP[+16]VTKSF	SSPVTKSF	#N/A	#N/A	Library Peptides			#N/A
SSPVTKSFN	SSPVTKSFN	#N/A	#N/A	Library Peptides			#N/A
SSPVTKSFNRGEC	SSPVTKSFNRGEC	#N/A	#N/A	Library Peptides			#N/A
SSVVTVPSSSLGTQ	SSVVTVPSSSLGTQ	#N/A	#N/A	Library Peptides			#N/A
STAASF	STAASF	#N/A	#N/A	Library Peptides			#N/A
STKGPSVFPLAPSSKSTSGGTAAL	STKGPSVFPLAPSSKSTSGGTAAL	#N/A	#N/A	Library Peptides			#N/A
SWNSGALTSGVHTFPAVL	SWNSGALTSGVHTFPAVL	#N/A	#N/A	Library Peptides			#N/A
TANTSLSHY	TANTSLSHY	#N/A	#N/A	Library Peptides			#N/A
TC[+57]LVKGFYPSDIAVEWESNGQPENNY	TCLVKGFYPSDIAVEWESNGQPENNY	#N/A	#N/A	Library Peptides			#N/A
TC[+57]LVKGFYPSDIAVEWESNGQPENNY[+22]	TCLVKGFYPSDIAVEWESNGQPENNY	#N/A	#N/A	Library Peptides			#N/A
TC[+57]PPC[+57]PAPELL	TCPPCPAPELL	#N/A	#N/A	Library Peptides			#N/A
TCPPC[+57]PAPELLGGPSVF	TCPPCPAPELLGGPSVF	#N/A	#N/A	Library Peptides			#N/A
TC[+57]PPC[+57]PAPELLGGPSVF	TCPPCPAPELLGGPSVF	#N/A	#N/A	Library Peptides			#N/A
TC[+57]PPC[+57]PAPELLGGPSVF	TCPPCPAPELLGGPSVF	#N/A	#N/A	Library Peptides			#N/A
TCRPSQDINNY	TCRPSQDINNY	#N/A	#N/A	Library Peptides			#N/A
TC[+57]RPSQDINNY	TCRPSQDINNY	#N/A	#N/A	Library Peptides			#N/A
TC[+57]RPSQDINNYLSW	TCRPSQDINNYLSW	#N/A	#N/A	Library Peptides			#N/A
TFGGGTKL	TFGGGTKL	#N/A	#N/A	Library Peptides			#N/A
TFPAVLQSSGL	TFPAVLQSSGL	#N/A	#N/A	Library Peptides			#N/A
TFPAVLQSSGLY	TFPAVLQSSGLY	#N/A	#N/A	Library Peptides			#N/A
TFPAVLQSSGLY	TFPAVLQSSGLY	#N/A	#N/A	Library Peptides			#N/A
TFPAVLQSSGLY[+22]	TFPAVLQSSGLY	#N/A	#N/A	Library Peptides			#N/A
TINNDITLL	TINNDITLL	#N/A	#N/A	Library Peptides			#N/A
TINND[+22]ITLL	TINNDITLL	#N/A	#N/A	Library Peptides			#N/A
TINNDITLLKLSTAASF	TINNDITLLKLSTAASF	#N/A	#N/A	Library Peptides			#N/A
TISKAKGQPREPQVY	TISKAKGQPREPQVY	#N/A	#N/A	Library Peptides			#N/A
TLAGIVSW	TLAGIVSW	#N/A	#N/A	Library Peptides			#N/A
TLPPSRDELTKNQVSLT	TLPPSRDELTKNQVSLT	#N/A	#N/A	Library Peptides			#N/A
TLPPTFGGGTKL	TLPPTFGGGTKL	#N/A	#N/A	Library Peptides			#N/A
TLSKADYEKH	TLSKADYEKH	#N/A	#N/A	Library Peptides			#N/A
TLSKADYEKH	TLSKADYEKH	#N/A	#N/A	Library Peptides			#N/A
TLTLSKADY	TLTLSKADY	#N/A	#N/A	Library Peptides			#N/A
TLVGIVSW	TLVGIVSW	#N/A	#N/A	Library Peptides			#N/A
TLVGIVSW[+22]	TLVGIVSW	#N/A	#N/A	Library Peptides			#N/A
TLVGIVSWGSSTC	TLVGIVSWGSSTC	#N/A	#N/A	Library Peptides			#N/A
TNANTPDRL	TNANTPDRL	#N/A	#N/A	Library Peptides			#N/A
TNANTPDRLQ	TNANTPDRLQ	#N/A	#N/A	Library Peptides			#N/A
TNANTPDRLQQ	TNANTPDRLQQ	#N/A	#N/A	Library Peptides			#N/A
TNANTPDRLQQA	TNANTPDRLQQA	#N/A	#N/A	Library Peptides			#N/A
TNANTPDRLQQASL	TNANTPDRLQQASL	#N/A	#N/A	Library Peptides			#N/A
TNANTPDRLQQASLPL	TNANTPDRLQQASLPL	#N/A	#N/A	Library Peptides			#N/A
TNANTPD[+22]RLQQASLPL	TNANTPDRLQQASLPL	#N/A	#N/A	Library Peptides			#N/A
TNANTPDRLQQASLPL[+22]	TNANTPDRLQQASLPL	#N/A	#N/A	Library Peptides			#N/A
TNANTPDRLQQASLPLLSNTN	TNANTPDRLQQASLPLLSNTN	#N/A	#N/A	Library Peptides			#N/A
TQKSLSLSPG	TQKSLSLSPG	#N/A	#N/A	Library Peptides			#N/A
TSGGTAALGC[+57]LVKDYFPEPVTVSW	TSGGTAALGCLVKDYFPEPVTVSW	#N/A	#N/A	Library Peptides			#N/A
TSRLHSGVPS	TSRLHSGVPS	#N/A	#N/A	Library Peptides			#N/A
TTVWTDGLTSLDRY	TTVWTDGLTSLDRY	#N/A	#N/A	Library Peptides			#N/A
TVAAPSVF	TVAAPSVF	#N/A	#N/A	Library Peptides			#N/A
TVAAPSVF	TVAAPSVF	#N/A	#N/A	Library Peptides			#N/A
TVDTSSSTAY	TVDTSSSTAY	#N/A	#N/A	Library Peptides			#N/A
TVLHQD[+16]WLNGKEY	TVLHQDWLNGKEY	#N/A	#N/A	Library Peptides			#N/A
TVPSSSLGTQTY	TVPSSSLGTQTY	#N/A	#N/A	Library Peptides			#N/A
TVSSASTK	TVSSASTK	#N/A	#N/A	Library Peptides			#N/A
TVSSASTKGPS	TVSSASTKGPS	#N/A	#N/A	Library Peptides			#N/A
TVSSASTKGPSVF	TVSSASTKGPSVF	#N/A	#N/A	Library Peptides			#N/A
TVSSASTKGPSVFPLAPS	TVSSASTKGPSVFPLAPS	#N/A	#N/A	Library Peptides			#N/A
TVSSASTKGPSVFPLAPSSK	TVSSASTKGPSVFPLAPSSK	#N/A	#N/A	Library Peptides			#N/A
TVSSASTKGPSVFPLAPSSKS	TVSSASTKGPSVFPLAPSSKS	#N/A	#N/A	Library Peptides			#N/A
TVSSASTKGPSVFPLAPSSKST	TVSSASTKGPSVFPLAPSSKST	#N/A	#N/A	Library Peptides			#N/A
VAAPSVF	VAAPSVF	#N/A	#N/A	Library Peptides			#N/A
VDGVEVH	VDGVEVH	#N/A	#N/A	Library Peptides			#N/A
VDKSRW	VDKSRW	#N/A	#N/A	Library Peptides			#N/A
VDLSRLTSEDSAVY	VDLSRLTSEDSAVY	#N/A	#N/A	Library Peptides			#N/A
VDLSRLTSEDSAVYY	VDLSRLTSEDSAVYY	#N/A	#N/A	Library Peptides			#N/A
VKGFYPSDIAVEWESNGQPENNY	VKGFYPSDIAVEWESNGQPENNY	#N/A	#N/A	Library Peptides			#N/A
VKGFYPSDIAVEWESNGQPENNY[+22]	VKGFYPSDIAVEWESNGQPENNY	#N/A	#N/A	Library Peptides			#N/A
VNWVQQTL	VNWVQQTL	#N/A	#N/A	Library Peptides			#N/A
VNWVQQTL[+22]	VNWVQQTL	#N/A	#N/A	Library Peptides			#N/A
VQETLAAN	VQETLAAN	#N/A	#N/A	Library Peptides			#N/A
VQQTLAAN	VQQTLAAN	#N/A	#N/A	Library Peptides			#N/A
VQQTLAAN[+22]	VQQTLAAN	#N/A	#N/A	Library Peptides			#N/A
VSSASTKGPSVFPL	VSSASTKGPSVFPL	#N/A	#N/A	Library Peptides			#N/A
VVDVSHEDPEVKF	VVDVSHEDPEVKF	#N/A	#N/A	Library Peptides			#N/A
VVTAAHCGVTTSDVVVAGEFDQGSSSEKIQKL	VVTAAHCGVTTSDVVVAGEFDQGSSSEKIQKL	#N/A	#N/A	Library Peptides			#N/A
YCAREGDISGY	YCAREGDISGY	#N/A	#N/A	Library Peptides			#N/A
YVDGVEVH	YVDGVEVH	#N/A	#N/A	Library Peptides			#N/A
DVQMTQTTSSL	DVQMTQTTSSL	1	8.47	62_71_3_LC	Cntrl_1	Cntl	8081121
DVQMTQTTSSL	DVQMTQTTSSL	1	8.45	62_71_3_LC	Cntrl_2	Cntl	7530670
DVQMTQTTSSL	DVQMTQTTSSL	1	8.46	62_71_3_LC	4hr_1	4hr	1615757
DVQMTQTTSSL	DVQMTQTTSSL	1	8.48	62_71_3_LC	4hr_2	4hr	1545056
DVQMTQTTSSL	DVQMTQTTSSL	1	8.77	62_71_3_LC	20hr_1	20hr	91743
DVQMTQTTSSL	DVQMTQTTSSL	1	8.8	62_71_3_LC	20hr_2	20hr	85816
DVQMTQTTSSL	DVQMTQTTSSL	1	8.79	62_71_3_LC	48hr_1	48hr	447408
DVQMTQTTSSL	DVQMTQTTSSL	1	8.79	62_71_3_LC	48hr_2	48hr	441577
DVQM[+16]TQTTSSL	DVQMTQTTSSL	1	7.18	62_71_3_LC	Cntrl_1	Cntl	64774
DVQM[+16]TQTTSSL	DVQMTQTTSSL	1	7.17	62_71_3_LC	Cntrl_2	Cntl	67593
DVQM[+16]TQTTSSL	DVQMTQTTSSL	1	7.12	62_71_3_LC	4hr_1	4hr	31682266
DVQM[+16]TQTTSSL	DVQMTQTTSSL	1	7.12	62_71_3_LC	4hr_2	4hr	31156502
DVQM[+16]TQTTSSL	DVQMTQTTSSL	1	7.09	62_71_3_LC	20hr_1	20hr	428570
DVQM[+16]TQTTSSL	DVQMTQTTSSL	1	7.09	62_71_3_LC	20hr_2	20hr	388464
DVQM[+16]TQTTSSL	DVQMTQTTSSL	1	7.1	62_71_3_LC	48hr_1	48hr	544924
DVQM[+16]TQTTSSL	DVQMTQTTSSL	1	7.11	62_71_3_LC	48hr_2	48hr	497304
